# Supplementary material
Source: PubMed Central journal article supplement (PMC3399028)
Supplement: NIHMS383528-supplement-1_si_001.pdf [file NIHMS383528-supplement-1_si_001.pdf]

# Supporting Information

for

## Structural Evolution of Environmentally Responsive Cationic Liposome–DNA Complexes with a Reducible Lipid Linker

*Rahau S. Shirazi, Kai K. Ewert, Bruno F. B. Silva, Cecilia Leal, Youli Li, and Cyrus R. Safinya*

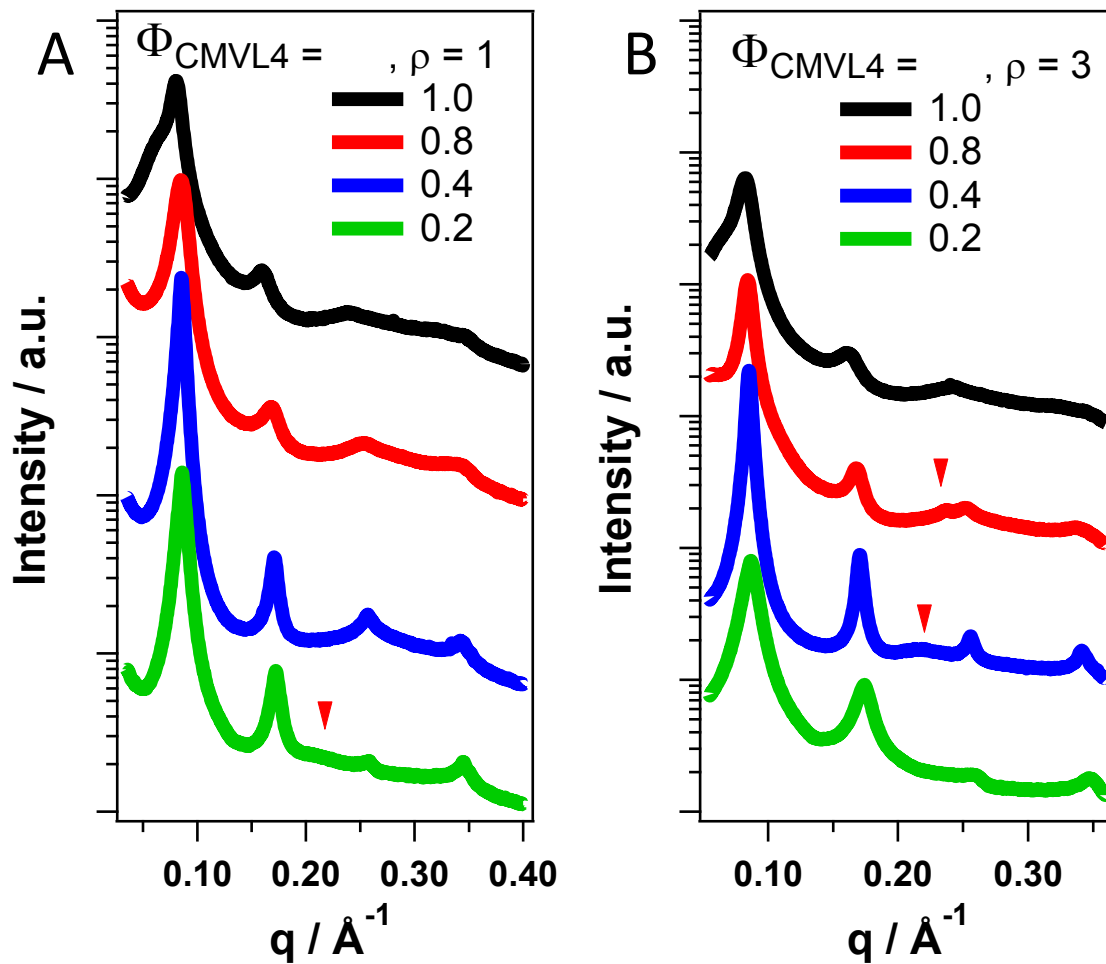

**Figure S1.** SAXS patterns of CMVL4/DOPC–DNA complexes at  $\Phi_{\text{CMVL4}} = 0.2, 0.4, 0.8,$  and  $1$  at room temperature in nonreducing media for  $\rho = 1$  (A) and  $\rho = 3$  (B). The patterns are characteristic for lamellar complexes. Red arrowheads point to  $q_{\text{DNA}}$ .

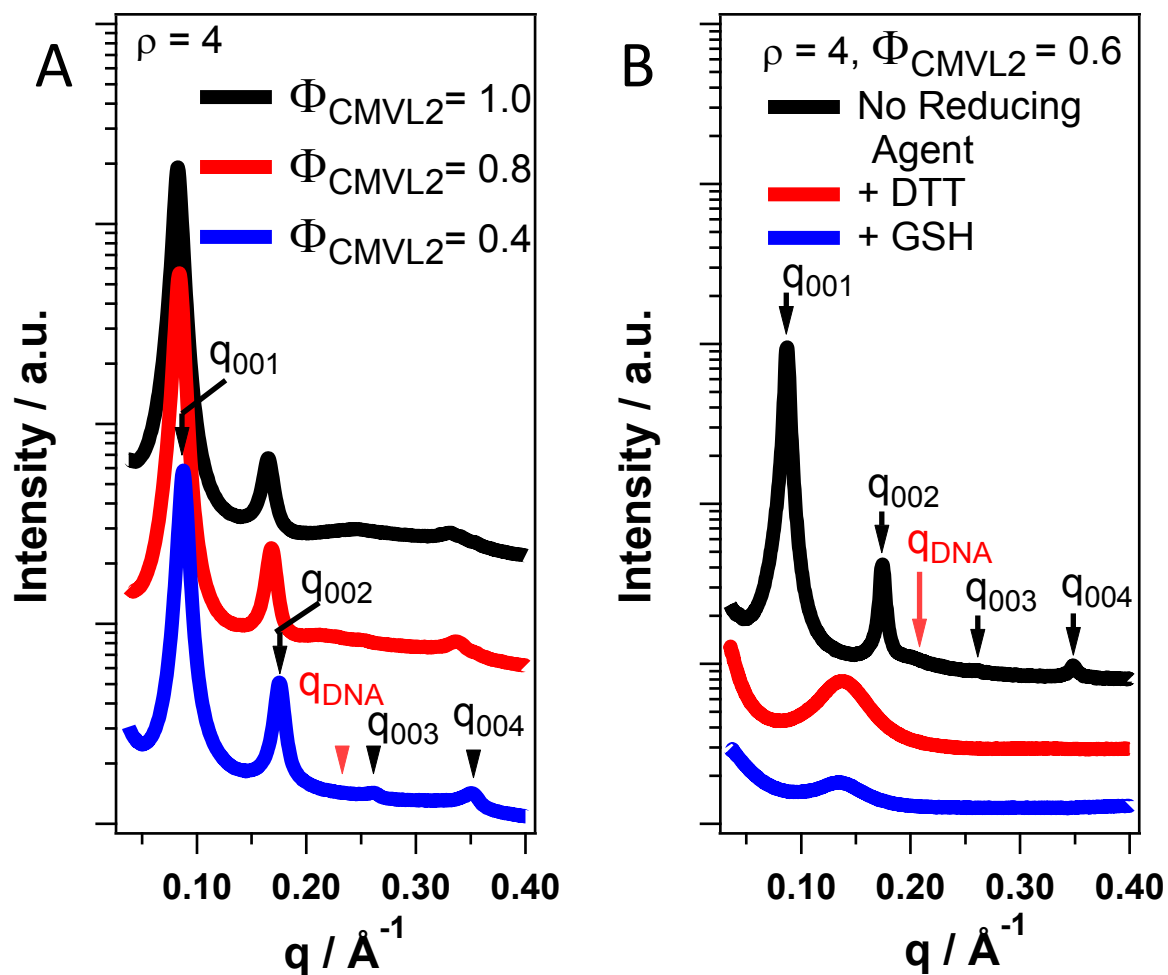

**Figure S2.** SAXS patterns of positively charged ( $\rho = 4$ ) CMVL2/DOPC–DNA complexes at room temperature in reducing and nonreducing media. (A) SAXS data for complexes of varied  $\Phi_{\text{CMVL2}}$  (0.4, 0.8, and 1.0) in nonreducing media. The complexes are lamellar, as indicated by the characteristic peaks of the lamellar phase at  $q_{00n}$  (black arrows) and DNA–DNA correlation  $q_{\text{DNA}}$  (red arrow). (B) The scattering pattern of complexes at  $\Phi_{\text{CMVL2}} = 0.6$  in nonreducing media (black curve, top) also shows the characteristic peaks of the lamellar phase at  $q_{00n}$  (black arrows) and  $q_{\text{DNA}}$  (red arrow). Upon addition of the reducing agent DTT (red curve, middle) or GSH (blue curve, bottom) the lamellar peaks are replaced by a broad peak at  $q \approx 0.14 \text{\AA}^{-1}$ .

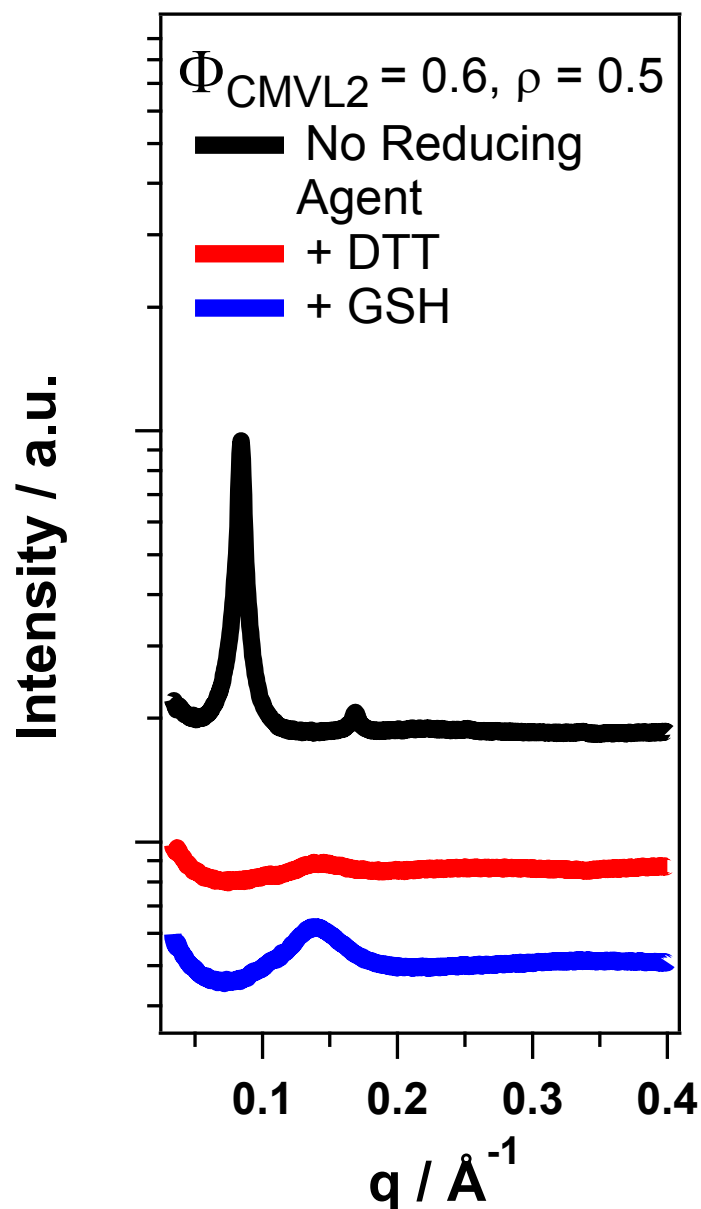

**Figure S3.** SAXS patterns demonstrating the effect of reducing agent on the structure of anionic and isoelectric ( $\rho = 0.5$  and  $1$ , respectively) CMVL2/DOPC–DNA complexes ( $\Phi_{\text{CMVL2}} = 0.6$ ). Anionic CMVL2/DOPC–DNA complexes ( $\rho = 0.5$ ) in nonreducing media (black curve, top) display a scattering pattern characteristic for lamellar complexes. After addition of the reducing agents DTT (red curve, middle) or GSH (blue curve, bottom) at room temperature, the lamellar peaks are replaced by a broad peak at  $q \approx 0.14 \text{ \AA}^{-1}$ .

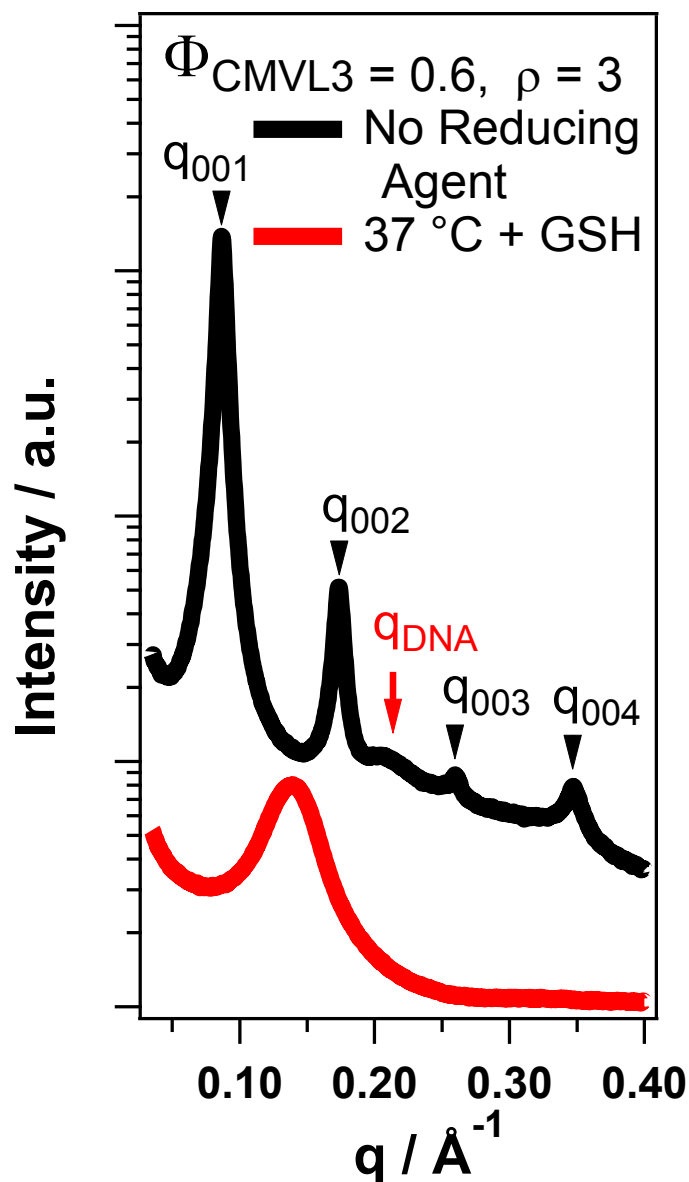

**Figure S4.** SAXS patterns demonstrating the effect of reducing agent on the structure of CMVL3/DOPC–DNA complexes at  $\rho = 3$  and  $\Phi_{\text{CMVL3}} = 0.6$ . The CMVL3/DOPC–DNA complexes in nonreducing media (black curve, top) display a scattering pattern characteristic for lamellar complexes. Upon incubation with the reducing agent GSH at 37 °C, the lamellar peaks are replaced by a broad peak at  $q \approx 0.14 \text{ \AA}^{-1}$ .

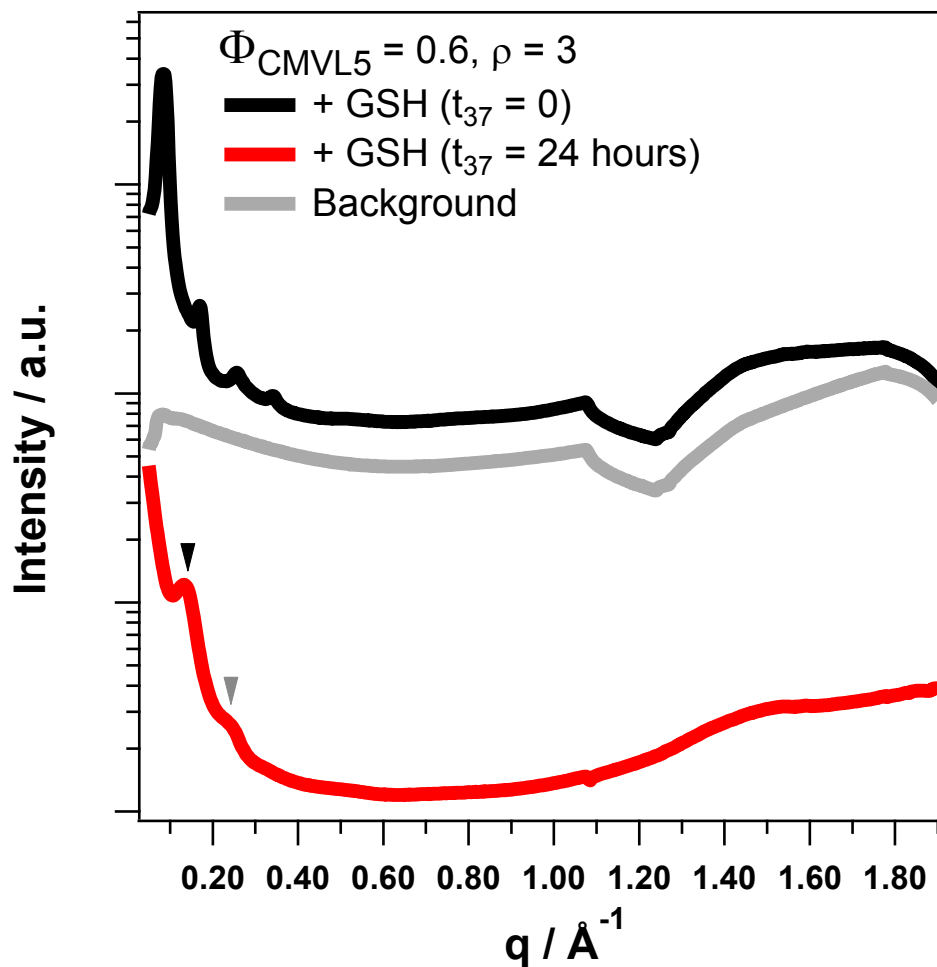

**Figure S5.** Time evolution of the synchrotron X-ray scattering profiles (small and wide angle) of CMVL5/DOPC–DNA complexes at  $\rho = 3$  and  $\Phi_{\text{CMVL5}} = 0.6$  on incubation with the reducing agent GSH at 37 °C. Immediately after addition of GSH ( $t = 0$ ; red curve, top), the sample still displays a scattering pattern characteristic for lamellar complexes ( $q_{001} = 0.0825 \text{ \AA}^{-1}$ ). Note that the comparison of this pattern with the corresponding scattering background shows that the dip in scattering intensity between  $q = 1$  and  $1.4 \text{ \AA}^{-1}$  is an artifact. The absence of sharp peaks at large  $q$  indicates that the lipid tails are in the chain-melted phase. After 24 hours of incubation at 37 °C (green curve, bottom), the sharp peaks of the lamellar phase have been replaced by broad peaks at  $q = 0.134 \text{ \AA}^{-1}$  and  $q = 0.235$  (arrowheads). The absence of sharp wide-angle peaks demonstrates that the lipid tails remain in the chain-melted phase, in contrast to what we observed with the reducing agent DTT (cf. manuscript).

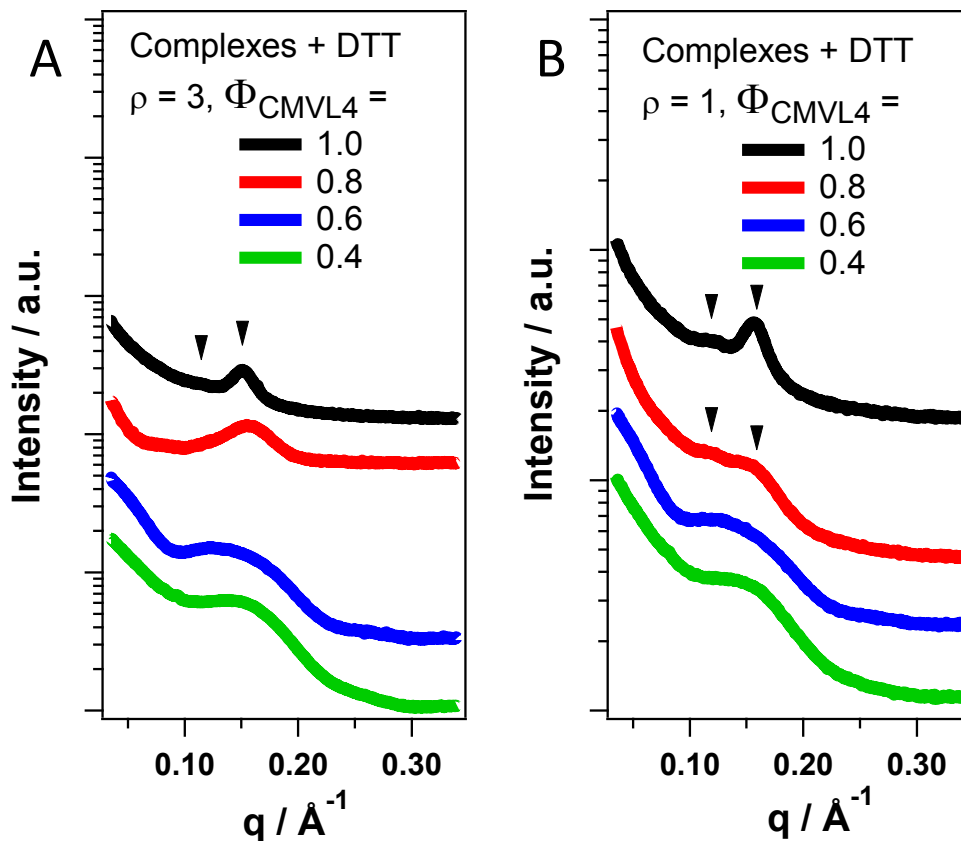

**Figure S6.** Synchrotron SAXS profiles of positively charged (A) and isoelectric (B) CMVL4/DOPC–DNA complexes ( $\rho = 3$  and  $\rho = 1$ , respectively) at varied  $\Phi_{\text{CMVL4}}$  after treatment with the reducing agent DTT at room temperature. At low  $\Phi_{\text{CMVL4}}$  of 0.4 (green curves) and 0.6 (blue curves), i. e., high DOPC content, the SAXS profiles appear to show one very broad peak at  $q \approx 0.15 \text{ \AA}^{-1}$ . At higher  $\Phi_{\text{CMVL4}}$ , this peaks resolves into two broad peaks, at  $q = 0.12 \text{ \AA}^{-1}$  and  $q = 0.156 \text{ \AA}^{-1}$ . The data is consistent with our hypothesis that the broad peak at  $q = 0.156 \text{ \AA}^{-1}$  is the DNA–DNA correlation peak resulting from the “loosely organized” DNA–CMVL headgroup phase, while the peak at  $q = 0.12 \text{ \AA}^{-1}$  stems from a disordered (defect-rich) lamellar phase of bilayers containing DOPC and the cleaved CMVL tails. The amount of DNA (and thus CMVL at a given  $\rho$ ) per sample is constant, which means that the amount of DOPC and therefore the membrane volume increases with decreasing  $\Phi_{\text{CMVL4}}$ . Thus, for low  $\Phi_{\text{CMVL4}}$ , the broad peak stemming from the disordered lamellar phase at  $q = 0.12 \text{ \AA}^{-1}$  increases in intensity, merging with the peak at  $q = 0.156 \text{ \AA}^{-1}$  (whose intensity does not change with  $\Phi_{\text{CMVL4}}$ ) and covering it.

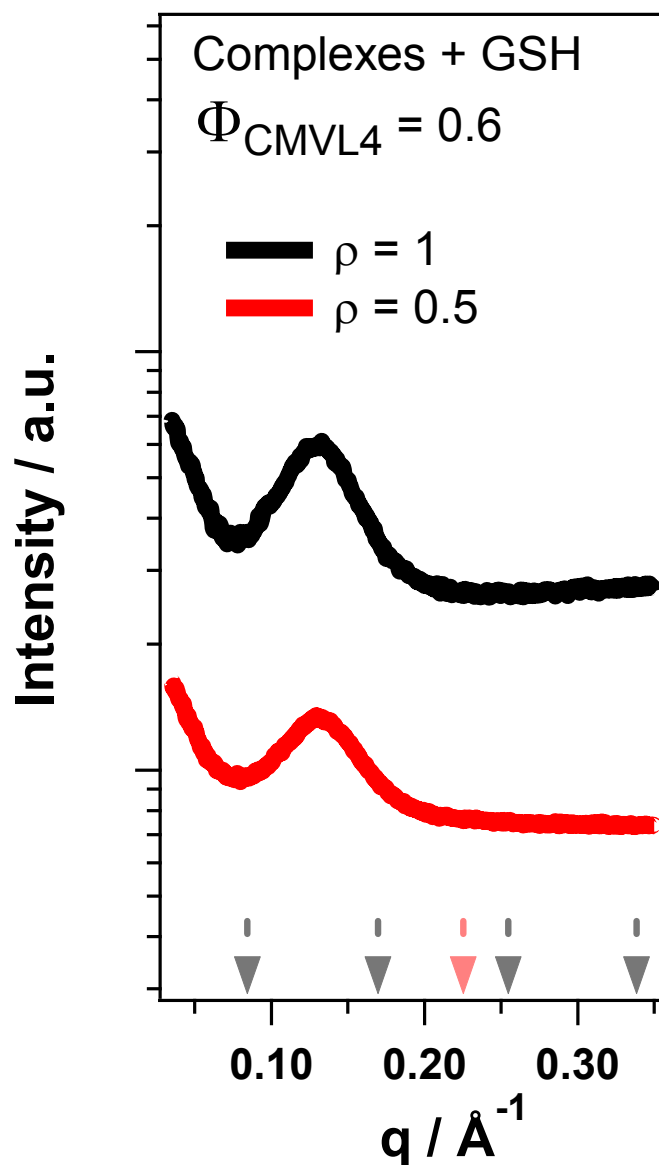

**Figure S7.** Synchrotron SAXS profiles of negatively charged (bottom) and isoelectric (top) CMVL4/DOPC–DNA complexes ( $\rho = 0.5$  and  $\rho = 1$ , respectively) at  $\Phi_{\text{CMVL4}} = 0.6$  after treatment with the reducing agent GSH at 37 °C for hours. The scattering patterns exhibit a broad peak at  $q \approx 0.13 \text{ \AA}^{-1}$  and no reflections stemming from a lamellar phase.
